# Supplementary material
Source: Springer Nature journal article supplement (https://www.springermedizin.de/resource/supplementary/12965_2006_38_MOESM1_ESM.pdf/9572986)

M 1 2 3 4

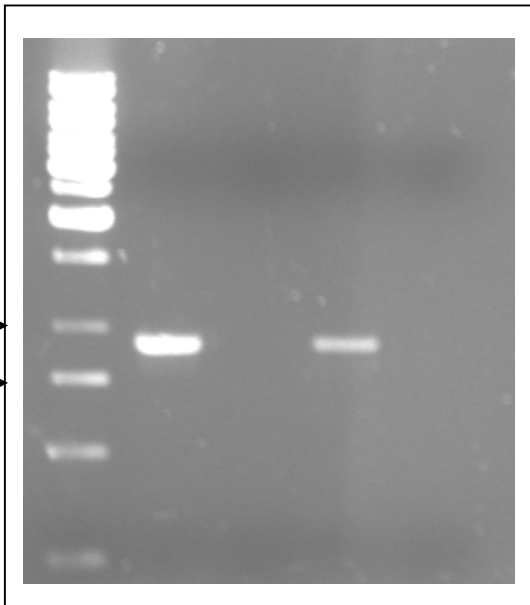

1000 bp →

750 bp →

← 923 bp

Supplement: MOESM1 [file 9572986]
